# Supplementary material for: LPCAT1 enhances castration resistant prostate cancer progression via increased mRNA synthesis and PAF production
Source: PubMed Central journal article supplement (PMC7605678; doi:10.1371/journal.pone.0240801), 2020-11-02

Fig1

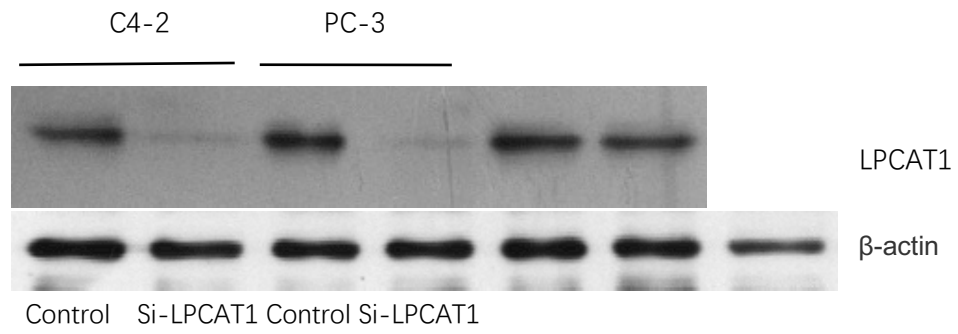

Fig2

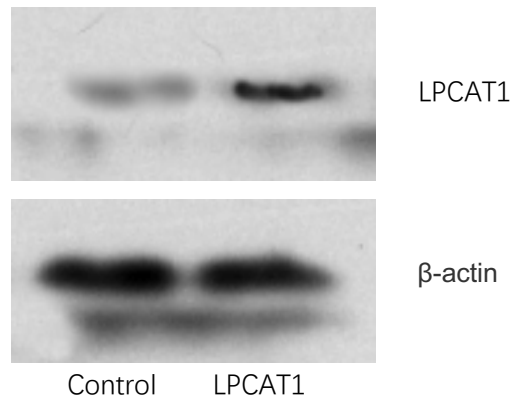

Fig 4

A

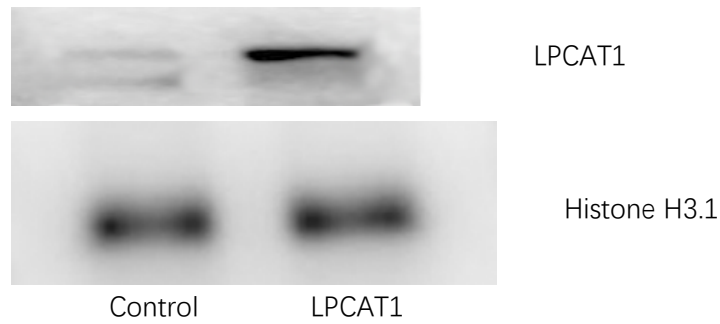

B

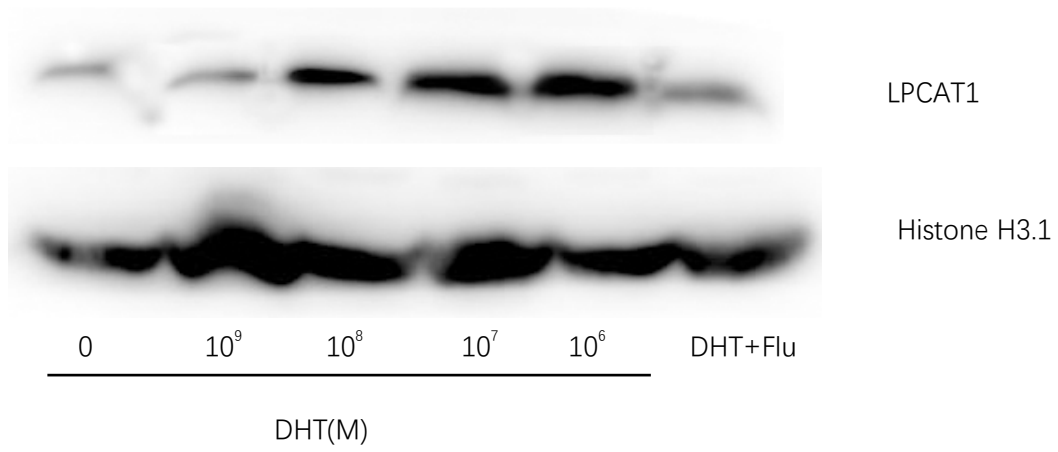

E

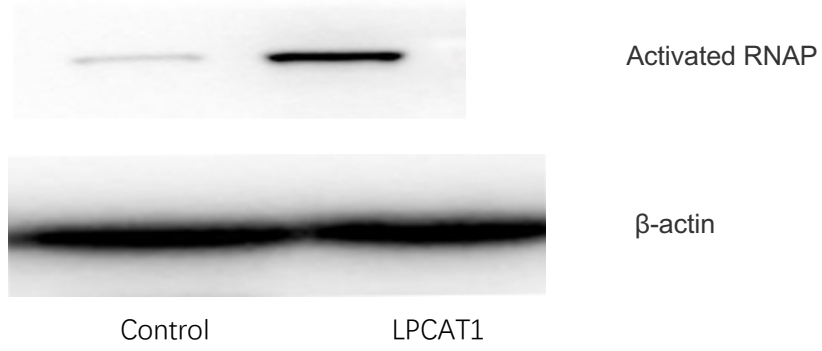

F

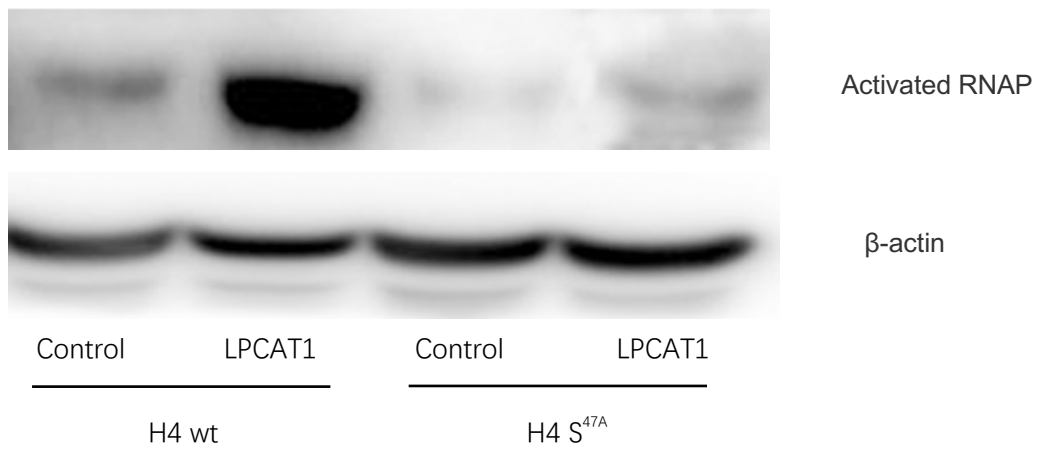

Fig 1A

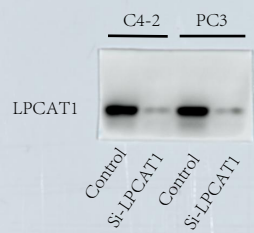

Fig 1A

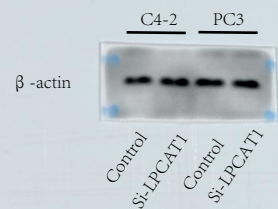

Fig 2A

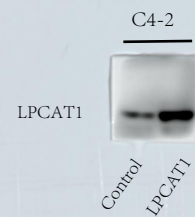

Fig 2A

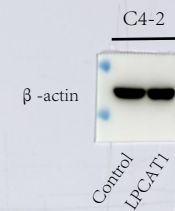

Fig 4A

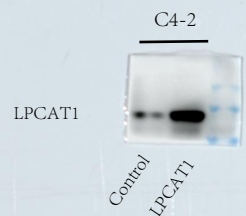

Fig 4A

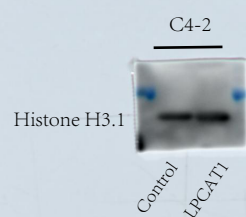

Fig 4B

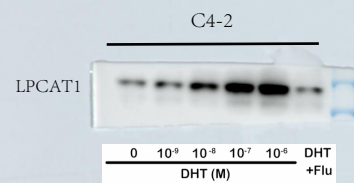

Fig 4B

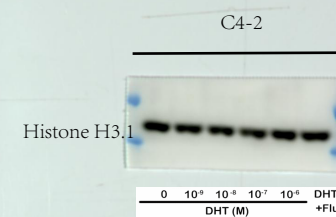

Fig 4E

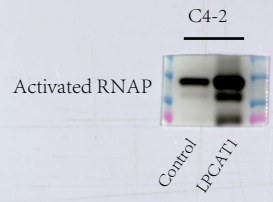

Fig 4E

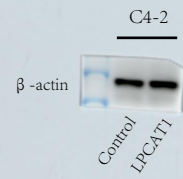

Fig 4F

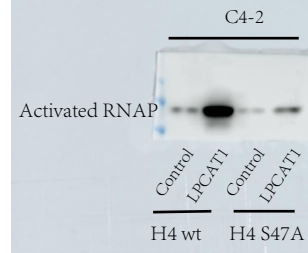

Fig 4F

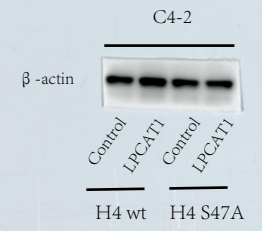

Supplement: pone.0240801.s001.pdf [file pone.0240801.s001.pdf]
